# Supplementary material
Source: PubMed Central journal article supplement (PMC6002690)
Supplement: MCB.00010-18_zmb999101779s1.pdf [file MCB.00010-18_zmb999101779s1.pdf]

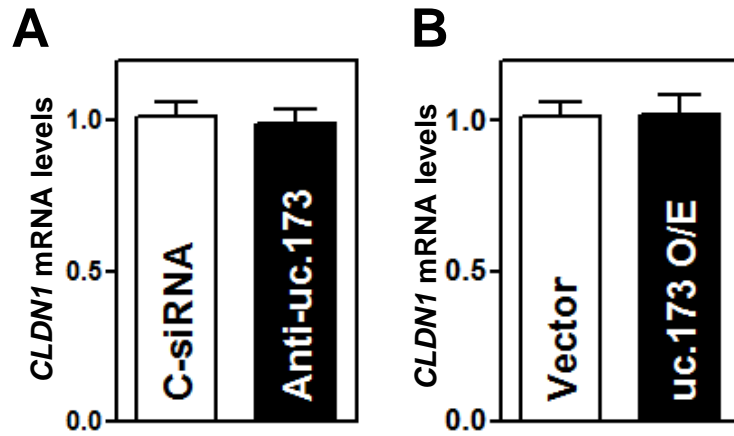

**Supplementary FIG. 1:** Changes in the levels of *CLDN1* mRNA after *uc.173* silencing (A) and *uc.173* overexpression (B). After Caco-2 cells were transfected with anti-*uc.173* or *uc.173* expression vector, total RNA was harvested 48 h thereafter. The levels of *CLDN1* mRNA were measured by Q-PCR analysis. Values are means  $\pm$  SEM of data from triplicate experiments.

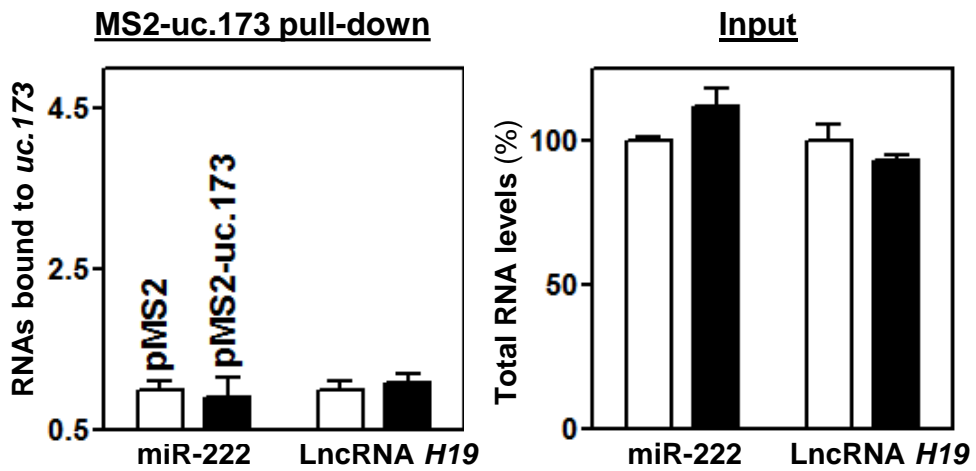

**Supplementary FIG. 2:** Binding of *uc.173* to miR-222 and lncRNA *H19*. Twenty-four hour after co-transfection with pMS2-GST and pMS2 or pMS2-*uc.173* vectors, levels of miR-222 and H19 in the materials pulled down by pMS2-*uc.173* (*left*) and total input RNAs (*right*) were examined by Q-PCR analysis. Values are means  $\pm$  SEM from triplicate experiments.

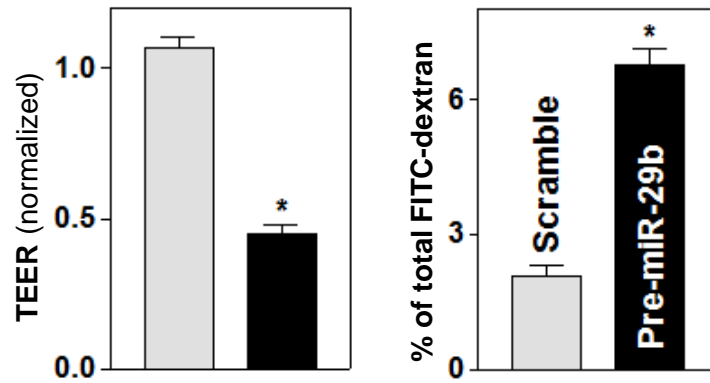

**Supplementary FIG. 3:** Ectopically expressed miR-29b disrupts the epithelial barrier function. Caco-2 cells were transfected with pre.-miR-29b, TEER (*left*) and FITC-dextran paracellular permeability (*right*) were examined 48 h thereafter. Values are means  $\pm$  SEM of data from six samples. \* $P < 0.05$  compared with scramble.

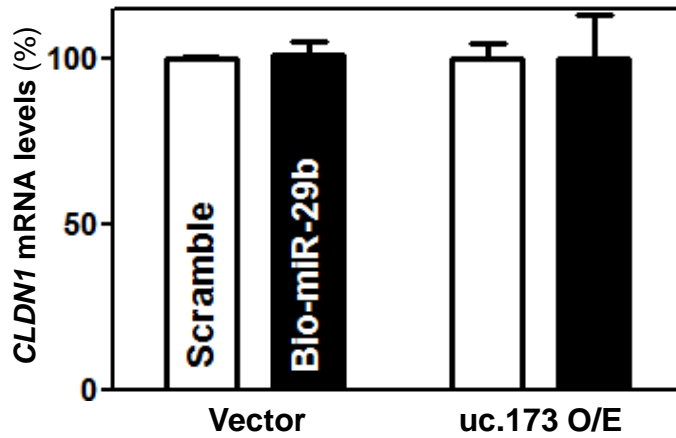

**Supplementary FIG. 4:** Changes in the levels of input *CLDN1* mRNA after cotransfection with biotin-miR-29b and *uc.173* expression vector. Twenty-four hours after cells were transfected with *uc.173* expression vector, they were transfected with bio-miR-29b. The levels of total *CLDN1* mRNA were examined 24 h thereafter. Values are means  $\pm$  SEM from triplicate experiments.

**Supplementary Table 1 : Primers used in the study**

| <b>Name</b>           | <b>Sequence 5' to 3'</b>      |
|-----------------------|-------------------------------|
| uc.173-Sense (S)      | GGTACCAGTCCTTCAGTTTAGAACC     |
| uc.173-Antisense (AS) | GATATCGTAATATTCATATATAA       |
|                       |                               |
| Luc-5'UTR-S           | GCTAGCCGGACCAGAAGCCAGGAG      |
| Luc-5'UTR-AS          | GAGCTCCTCAGTGGCAGGTGCAGAA     |
|                       |                               |
| Luc-CR-S              | GCTAGCTTGCAGCTTCTGGGTTTCAT    |
| Luc-CR-AS             | GAGCTCTCACACGTAGTCTTTCCCAGT   |
|                       |                               |
| Luc-3'UTR-S           | GCTAGCCCTCCTGGAGAGAATACAAA    |
| Luc-3'UTR-AS          | GAGCTCGGCACAGTAATTGTGGCAA     |
|                       |                               |
| 3'UTR-F1-S            | GCTAGCAGCGGCGAAGGAAGAGAT      |
| 3'UTR-F1-AS           | CTCGAGCCAGCTGCAGACCAAAGTG     |
|                       |                               |
| 3'UTR-F2-S            | GCTAGCCATACTGTGTTTCTGAGCTGTGG |
| 3'UTR-F2-AS           | CTCGAGGGAGGAAATGAACTCATGACAA  |
|                       |                               |
| 3'UTR-F3-S            | GCTAGCGCTGGTAGAGGTAATGCGAGT   |
| 3'UTR-F3-AS           | CTCGAGCTGAAGGGCCTTTGCTACAG    |
|                       |                               |
| 3'UTR-F4-S            | GCTAGCCTGTAGCAAAGGCCCTTCAG    |
| 3'UTR-F4-AS           | CTCGAGCTGCGTCCCTCTTGACTCAT    |
|                       |                               |
| 3'UTR-F5-S            | GCTAGCCATGCCTATGTCGCATGAGT    |
| 3'UTR-F5-AS           | CTCGAGCAGCCCCCAAATATCAATTC    |
|                       |                               |
| 3'UTR-F3-Mut          | TGCATGGCCTGTCGTTAATACTA       |
